# Supplementary material for: Ultra-stretchable ion gels based on physically cross-linked polymer networks
Source: Royal Society of Chemistry journal article supplement (doi:10.1039/d2tc01721k), 2022-01-01
Supplement: d2tc01721k1.pdf [file d2tc01721k1.pdf]

## Electronic Supplementary Information for

### Ultra-stretchable Ion Gels Based on Physically Cross-linked Polymer Networks

Zehao Tang,<sup>†a</sup> Dong Liu,<sup>†a</sup> Xiaolin Lyu,<sup>\*b</sup> Yadi Liu,<sup>a</sup> Yun Liu,<sup>a</sup> Weilu Yang,<sup>a</sup> Zhihao Shen<sup>\*a</sup> and Xinghe Fan<sup>\*a</sup>

<sup>a</sup> Beijing National Laboratory for Molecular Sciences, Key Laboratory of Polymer Chemistry and Physics of Ministry of Education, Center for Soft Matter Science and Engineering, and College of Chemistry and Molecular Engineering, Peking University, Beijing, 100871, China

<sup>b</sup> Key Laboratory of Advanced Materials Technologies, College of Materials Science and Engineering, Fuzhou University, Fuzhou, 350108, China

#### Table of Contents

|                                                                          |    |
|--------------------------------------------------------------------------|----|
| Table S1. Feed ratio of P(EA- <i>co</i> -AA)                             | S2 |
| Table S2. Sample composition and tensile properties of ion gels          | S2 |
| Table S3. Parameters for the VTF fitting of the conductivity data        | S2 |
| Scheme S1. Chemical structure of [EMIM][TFSI]                            | S3 |
| Figure S1. GPC curves of P(EA- <i>co</i> -AA)                            | S3 |
| Figure S2. <sup>1</sup> H NMR spectra of P(EA- <i>co</i> -AA)            | S3 |
| Figure S3. DSC thermograms of P(EA- <i>co</i> -AA) with different ratios | S4 |
| Figure S4. Photographs of the ion gel before and after stretching        | S4 |
| Figure S5. Storage and loss moduli of the ion gel from sample 78-16-6    | S4 |
| Figure S6. FTIR and WAXS results of PEA- <i>co</i> -AA and 78-0-22       | S5 |
| Figure S7. Tensile properties of ion gels reported in recent years       | S5 |
| Figure S8. TGA thermogram of the ion gel                                 | S5 |
| Figure S9. DSC thermogram of the ion gel                                 | S6 |
| Figure S10. DSC thermogram of the ion gel                                | S6 |
| Figure S11. Sensing performance of the ion gel                           | S6 |
| Figure S12. Schematic illustration of the preparation of the ion gel     | S7 |
| References                                                               | S7 |

**Table S1.** Feed ratio of P(EA-co-AA).

| Sample        | AIBN (mg) | EA (g) | AA (g) | Dioxane (mL) |
|---------------|-----------|--------|--------|--------------|
| P(EA-co-AA)-1 | 10.0      | 5.25   | 0.540  | 12           |
| P(EA-co-AA)-2 | 10.0      | 5.00   | 0.720  | 12           |
| P(EA-co-AA)-3 | 10.0      | 4.50   | 1.08   | 12           |
| P(EA-co-AA)-4 | 10.0      | 4.00   | 1.44   | 12           |
| P(EA-co-AA)-5 | 10.0      | 3.00   | 2.16   | 12           |
| P(EA-co-AA)-6 | 10.0      | 2.00   | 2.88   | 12           |

**Table S2.** Sample composition and tensile properties of different P(EA-co-AA-co-AANa) ion gels.

| Sample <sup>a)</sup> | Polymer <sup>b)</sup> | NaOH (mg) | EA (mol%) | AA (mol%) | AANa (mol%) | Stress (kPa) | Strain (%) |
|----------------------|-----------------------|-----------|-----------|-----------|-------------|--------------|------------|
| 78-22-0              | P(EA-co-AA)-3         | 0.00      | 78        | 22        | 0           | -            | -          |
| 78-19-3              | P(EA-co-AA)-3         | 5.00      | 78        | 19        | 3           | -            | -          |
| 78-16-6              | P(EA-co-AA)-3         | 10.0      | 78        | 16        | 6           | 60           | > 6500     |
| 78-10-12             | P(EA-co-AA)-3         | 20.0      | 78        | 10        | 12          | 980          | 2600       |
| 78-5-17              | P(EA-co-AA)-3         | 30.0      | 78        | 5         | 17          | 1100         | 790        |
| 78-0-22              | P(EA-co-AA)-3         | 40.0      | 78        | 0         | 22          | 1270         | 470        |
| 88-0-12              | P(EA-co-AA)-1         | 20.0      | 88        | 0         | 12          | 180          | 2700       |
| 85-3-12              | P(EA-co-AA)-2         | 20.0      | 85        | 3         | 12          | 740          | 2500       |
| 70-18-12             | P(EA-co-AA)-4         | 20.0      | 70        | 18        | 12          | 2600         | 910        |
| 52-36-12             | P(EA-co-AA)-5         | 20.0      | 52        | 36        | 12          | -            | -          |
| 38-50-12             | P(EA-co-AA)-6         | 20.0      | 38        | 50        | 12          | -            | -          |

<sup>a)</sup> Named based on the mole percentages of the three monomers, <sup>b)</sup> 400 mg of polymer in each sample.

**Table S3.** Parameters for the VTF fitting of the conductivity data

| $\sigma_0$ (S cm <sup>-1</sup> ) | $E_a$ (kJ mol <sup>-1</sup> ) | $T_0$ (K) |
|----------------------------------|-------------------------------|-----------|
| 0.086                            | 2.04                          | 157       |

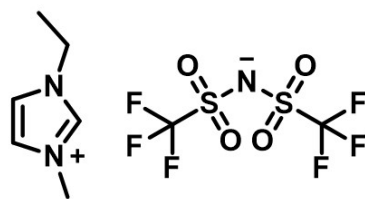

**Scheme S1.** Chemical structure of [EMIM][TFSI].

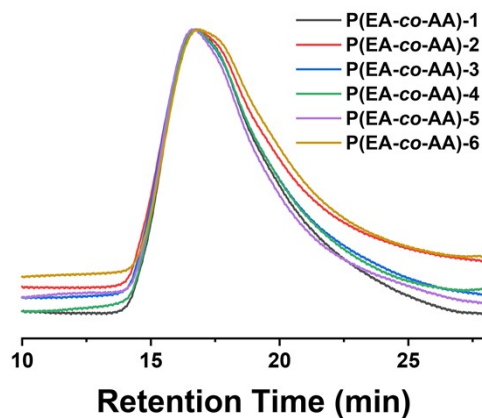

**Figure S1.** GPC curves of P(EA-co-AA).

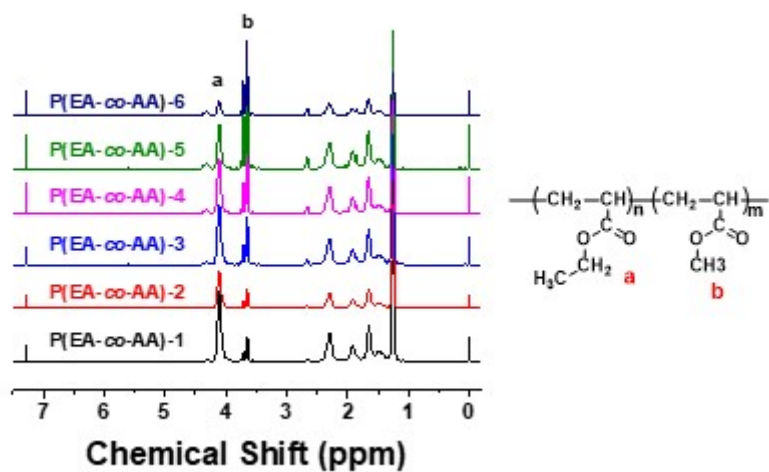

**Figure S2.**  $^1\text{H}$  NMR spectra of P(EA-co-AA) samples with  $\text{CDCl}_3$  as the solvent.

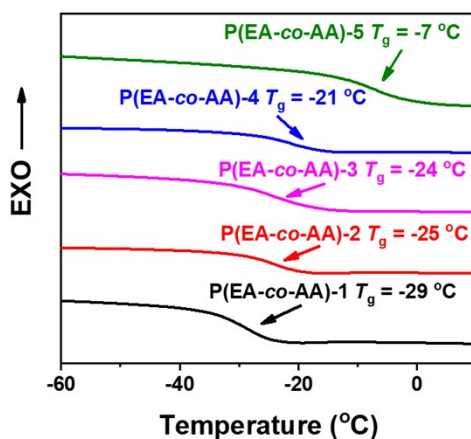

**Figure S3.** DSC thermograms of P(EA-co-AA) with different EA/AA ratios.

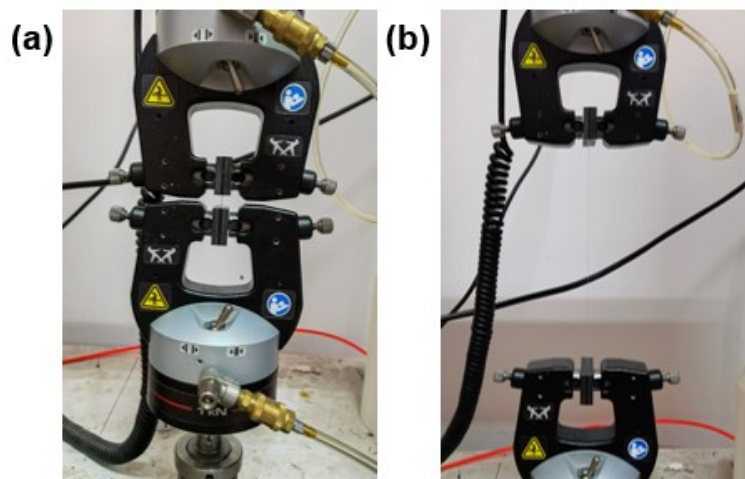

**Figure S4.** Photographs of the P(EA-co-AA-co-AANa) ion gel before (a) and after (b) stretching.

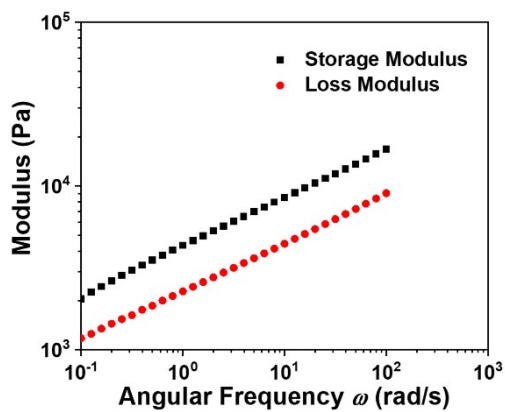

**Figure S5.** Storage and loss moduli of the ion gel from sample 78-16-6.

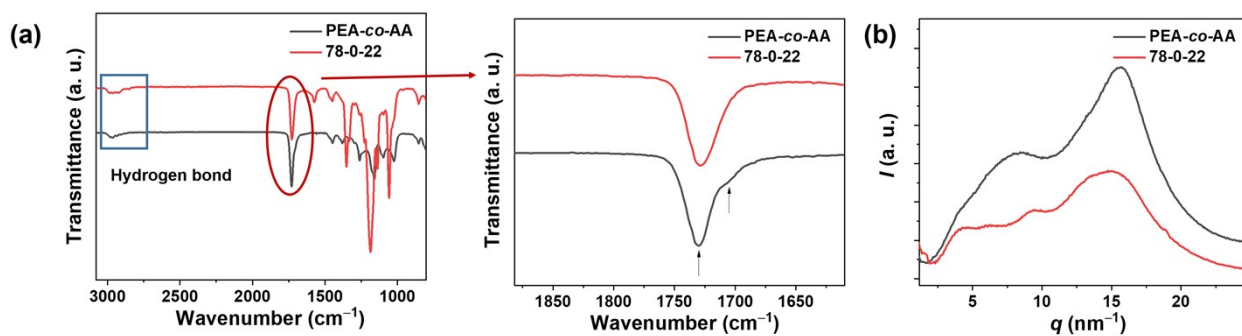

**Figure S6.** FTIR (a) and WAXS (b) results of PEA-co-AA and 78-0-22.

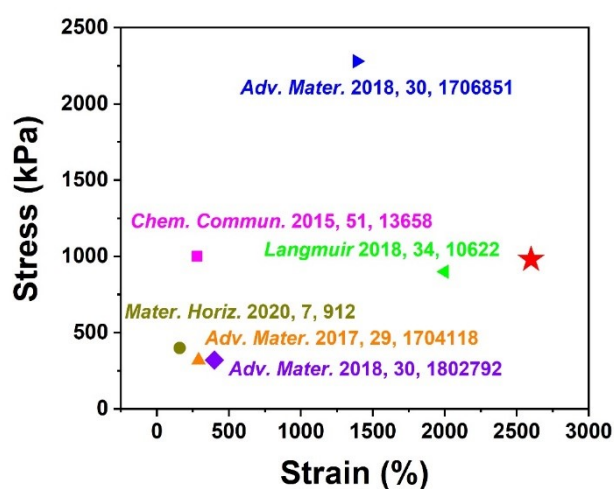

**Figure S7.** Breaking elongation and failure tensile stress of high-performance ion gels reported in recent years.<sup>1-6</sup> The red star indicates ion gel from sample 78-10-12 in this work.

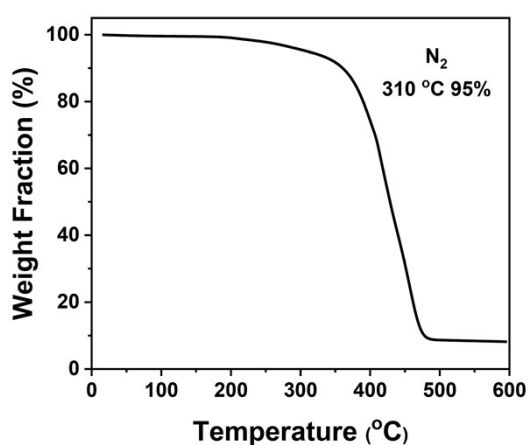

**Figure S8.** Thermogravimetric curve of the P(EA-co-AA-co-AANa) ion gel (78-10-12) at a heating rate of  $10\text{ }^{\circ}\text{C min}^{-1}$  under nitrogen.

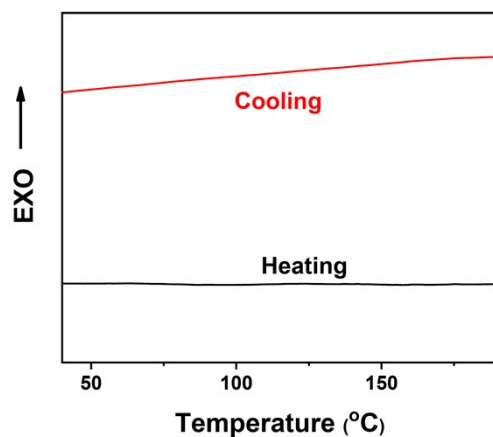

**Figure S9.** DSC thermogram of the P(EA-co-AA-co-AANa) ion gel at a heating and cooling rate of  $20\text{ }^{\circ}\text{C min}^{-1}$  under a nitrogen atmosphere.

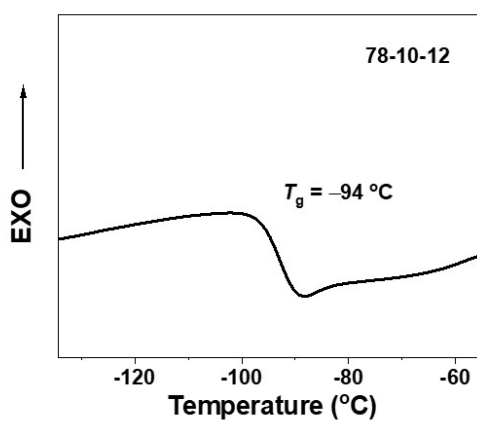

**Figure S10.** DSC thermogram of the ion gel from sample 78-10-12 at a heating and cooling rate of  $20\text{ }^{\circ}\text{C min}^{-1}$  under a nitrogen atmosphere.

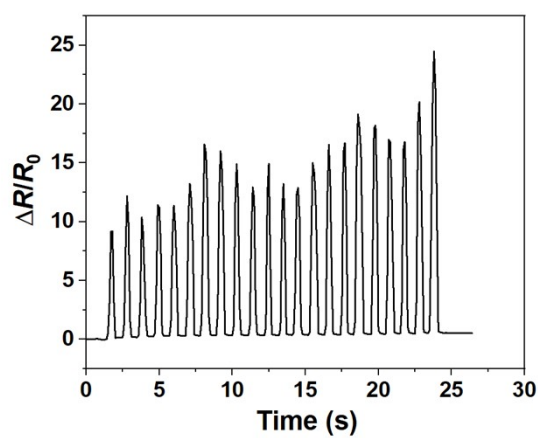

**Figure S11.** Sensing performance of the strain sensor in large strains.

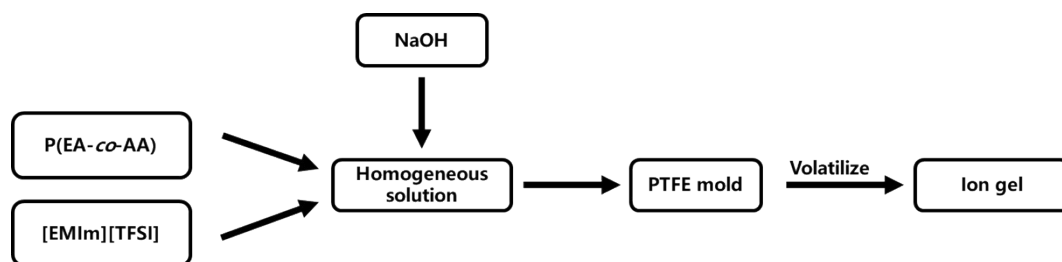

**Figure S12.** Schematic illustration of the preparation of the P(EA-co-AA-co-AANa) ion gel.

## References

1. M. L. Jin, S. Park, J. S. Kim, S. H. Kwon, S. Zhang, M. S. Yoo, S. Jang, H. J. Koh, S. Y. Cho, S. Y. Kim, C. W. Ahn, K. Cho, S. G. Lee, D. H. Kim and H. T. Jung, *Adv. Mater.*, 2018, **30**, e1706851.
2. F. Moghadam, E. Kamio, A. Yoshizumi and H. Matsuyama, *Chem. Commun.*, 2015, **51**, 13658-13661.
3. T. Yasui, E. Kamio and H. Matsuyama, *Langmuir*, 2018, **34**, 10622-10633.
4. Z. Cao, H. Liu and L. Jiang, *Mater. Horiz.*, 2020, **7**, 912-918.
5. E. Kamio, T. Yasui, Y. Iida, J. P. Gong and H. Matsuyama, *Adv. Mater.*, 2017, **29**, 1704118.
6. R. Tamate, K. Hashimoto, T. Horii, M. Hirasawa, X. Li, M. Shibayama and M. Watanabe, *Adv. Mater.*, 2018, **30**, e1802792.
